# Supplementary material for: Transcriptome Analysis of the Immortal Human Keratinocyte HaCaT Cell Line Damaged by Tritiated Water
Source: MDPI journal article supplement (doi:10.3390/biology12030405), 2023-03-03
Supplement: s1 [file s1]

## Supplementary Information

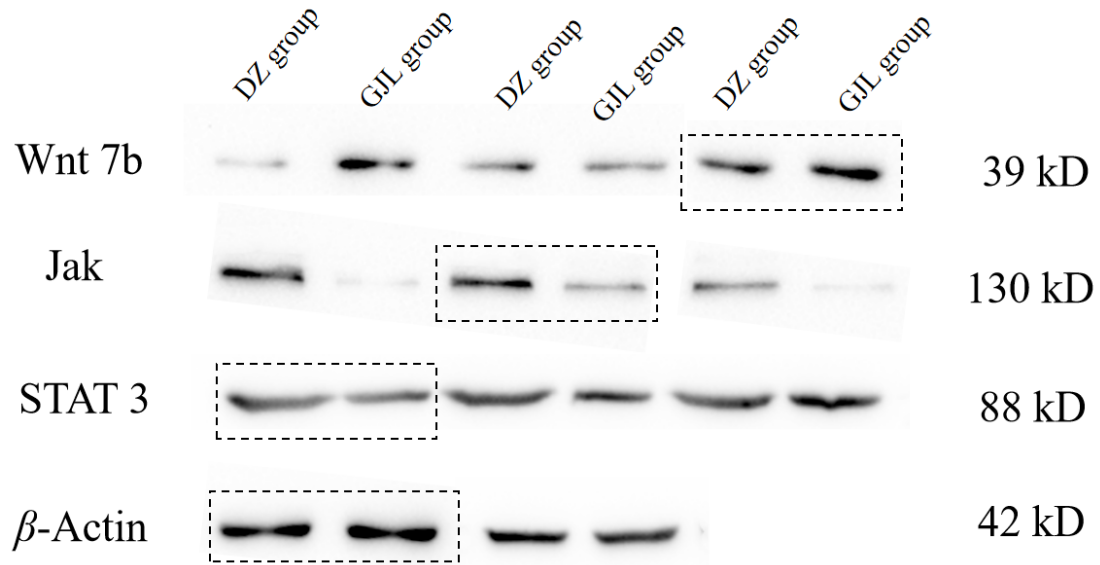

**SI Figure S1.** Full unedited western blot for Figure. 6 (A).

**SI Table S1. DEGs on the sides and top in for Figure. 3 (A)**

| Gene ID   | Gene Symbol     | log <sub>2</sub> FC | -log <sub>10</sub> (Q value) | category |
|-----------|-----------------|---------------------|------------------------------|----------|
| 107987457 | LOC107987457    | -8.09               | 27.20                        | Down     |
| 100526740 | ATP 5MF-PT CD1  | -7.36               | 17.41                        | Down     |
| 100526832 | PHOSPHO2-KLHL23 | 7.09                | 15.09                        | Up       |
| 54921     | CHTF8           | 6.65                | 11.37                        | Up       |
| 56100     | PCDHGB6         | 5.29                | 8.98                         | Up       |
| 6818      | SULT1A3         | 1.77                | 300.00                       | Up       |

**SI Table S2. Go ecrichment of list**

| Part | ID         | Description                                    | GeneRatio | BgRatio   | pvalue   | qvalue   | geneID       |
|------|------------|------------------------------------------------|-----------|-----------|----------|----------|--------------|
| BP   | GO:0009812 | flavonoid metabolic process                    | 2/10      | 15/18862  | 2.65E-05 | 3.71E-03 | 445329/54576 |
| BP   | GO:0006805 | xenobiotic metabolic process                   | 2/10      | 120/18862 | 1.75E-03 | 4.15E-02 | 445329/54576 |
| BP   | GO:0071466 | cellular response to xenobiotic stimulus       | 2/10      | 125/18862 | 1.89E-03 | 4.15E-02 | 445329/54576 |
| BP   | GO:0009410 | response to xenobiotic stimulus                | 2/10      | 131/18862 | 2.08E-03 | 4.15E-02 | 445329/54576 |
| BP   | GO:1901215 | negative regulation of neuron death            | 2/10      | 195/18862 | 4.53E-03 | 4.15E-02 | 7015/445329  |
| BP   | GO:0019614 | catechol-containing compound catabolic process | 1/10      | 10/18862  | 5.29E-03 | 4.15E-02 | 445329       |
| BP   | GO:0042424 | catecholamine catabolic process                | 1/10      | 10/18862  | 5.29E-03 | 4.15E-02 | 445329       |

|    |            |                                                                                 |      |           |          |          |              |
|----|------------|---------------------------------------------------------------------------------|------|-----------|----------|----------|--------------|
| BP | GO:0030422 | production of siRNA involved in RNA interference                                | 1/10 | 11/18862  | 5.82E-03 | 4.15E-02 | 7015         |
| BP | GO:0052697 | xenobiotic glucuronidation                                                      | 1/10 | 11/18862  | 5.82E-03 | 4.15E-02 | 54576        |
| BP | GO:0006068 | ethanol catabolic process                                                       | 1/10 | 13/18862  | 6.87E-03 | 4.15E-02 | 445329       |
| BP | GO:0019336 | phenol-containing compound catabolic process                                    | 1/10 | 13/18862  | 6.87E-03 | 4.15E-02 | 445329       |
| BP | GO:1902570 | protein localization to nucleolus                                               | 1/10 | 14/18862  | 7.40E-03 | 4.15E-02 | 7015         |
| BP | GO:1903799 | negative regulation of production of miRNAs involved in gene silencing by miRNA | 1/10 | 15/18862  | 7.93E-03 | 4.15E-02 | 7015         |
| BP | GO:0034310 | primary alcohol catabolic process                                               | 1/10 | 16/18862  | 8.45E-03 | 4.15E-02 | 445329       |
| BP | GO:0034504 | protein localization to nucleus                                                 | 2/10 | 275/18862 | 8.82E-03 | 4.15E-02 | 7015/729540  |
| BP | GO:0016246 | RNA interference                                                                | 1/10 | 17/18862  | 8.98E-03 | 4.15E-02 | 7015         |
| BP | GO:0090399 | replicative senescence                                                          | 1/10 | 17/18862  | 8.98E-03 | 4.15E-02 | 7015         |
| BP | GO:0070200 | establishment of protein localization to telomere                               | 1/10 | 18/18862  | 9.50E-03 | 4.15E-02 | 7015         |
| BP | GO:0031647 | regulation of protein stability                                                 | 2/10 | 295/18862 | 1.01E-02 | 4.15E-02 | 7015/8293    |
| BP | GO:0006607 | NLS-bearing protein import into nucleus                                         | 1/10 | 20/18862  | 1.06E-02 | 4.15E-02 | 729540       |
| BP | GO:0052695 | cellular glucuronidation                                                        | 1/10 | 20/18862  | 1.06E-02 | 4.15E-02 | 54576        |
| BP | GO:1901214 | regulation of neuron death                                                      | 2/10 | 302/18862 | 1.06E-02 | 4.15E-02 | 7015/445329  |
| BP | GO:0060965 | negative regulation of gene silencing by miRNA                                  | 1/10 | 21/18862  | 1.11E-02 | 4.15E-02 | 7015         |
| BP | GO:0006067 | ethanol metabolic process                                                       | 1/10 | 22/18862  | 1.16E-02 | 4.15E-02 | 445329       |
| BP | GO:2000648 | positive regulation of stem cell proliferation                                  | 1/10 | 22/18862  | 1.16E-02 | 4.15E-02 | 7015         |
| BP | GO:2000773 | negative regulation of cellular senescence                                      | 1/10 | 22/18862  | 1.16E-02 | 4.15E-02 | 7015         |
| BP | GO:0005980 | glycogen catabolic process                                                      | 1/10 | 23/18862  | 1.21E-02 | 4.15E-02 | 8987         |
| BP | GO:0060149 | negative regulation of posttranscriptional gene silencing                       | 1/10 | 23/18862  | 1.21E-02 | 4.15E-02 | 7015         |
| BP | GO:0060967 | negative regulation of gene silencing by RNA                                    | 1/10 | 23/18862  | 1.21E-02 | 4.15E-02 | 7015         |
| BP | GO:1904754 | positive regulation of vascular associated smooth muscle cell migration         | 1/10 | 23/18862  | 1.21E-02 | 4.15E-02 | 7015         |
| BP | GO:0008202 | steroid metabolic process                                                       | 2/10 | 329/18862 | 1.24E-02 | 4.15E-02 | 445329/54576 |
| BP | GO:0009251 | glucan catabolic process                                                        | 1/10 | 24/18862  | 1.27E-02 | 4.15E-02 | 8987         |
| BP | GO:0051000 | positive regulation of nitric-oxide synthase activity                           | 1/10 | 24/18862  | 1.27E-02 | 4.15E-02 | 7015         |
| BP | GO:0051923 | sulfation                                                                       | 1/10 | 24/18862  | 1.27E-02 | 4.15E-02 | 445329       |
| BP | GO:0006063 | uronic acid metabolic process                                                   | 1/10 | 25/18862  | 1.32E-02 | 4.15E-02 | 54576        |
| BP | GO:0019585 | glucuronate metabolic process                                                   | 1/10 | 25/18862  | 1.32E-02 | 4.15E-02 | 54576        |
| BP | GO:0034035 | purine ribonucleoside bisphosphate                                              | 1/10 | 25/18862  | 1.32E-02 | 4.15E-02 | 445329       |

|    |            |                                                                                   |      |           |          |          |             |
|----|------------|-----------------------------------------------------------------------------------|------|-----------|----------|----------|-------------|
|    |            | metabolic process                                                                 |      |           |          |          |             |
| BP | GO:0044247 | cellular polysaccharide catabolic process                                         | 1/10 | 25/18862  | 1.32E-02 | 4.15E-02 | 8987        |
| BP | GO:0050427 | 3'-phosphoadenosine 5'-phosphosulfate metabolic process                           | 1/10 | 25/18862  | 1.32E-02 | 4.15E-02 | 445329      |
| BP | GO:1903798 | regulation of production of miRNAs involved in gene silencing by miRNA            | 1/10 | 25/18862  | 1.32E-02 | 4.15E-02 | 7015        |
| BP | GO:1990000 | amyloid fibril formation                                                          | 1/10 | 25/18862  | 1.32E-02 | 4.15E-02 | 8293        |
| BP | GO:0070997 | neuron death                                                                      | 2/10 | 342/18862 | 1.34E-02 | 4.15E-02 | 7015/445329 |
| BP | GO:0022616 | DNA strand elongation                                                             | 1/10 | 26/18862  | 1.37E-02 | 4.15E-02 | 7015        |
| BP | GO:0042634 | regulation of hair cycle                                                          | 1/10 | 26/18862  | 1.37E-02 | 4.15E-02 | 7015        |
| BP | GO:0070920 | regulation of production of small RNA involved in gene silencing by RNA           | 1/10 | 26/18862  | 1.37E-02 | 4.15E-02 | 7015        |
| BP | GO:0000272 | polysaccharide catabolic process                                                  | 1/10 | 27/18862  | 1.42E-02 | 4.15E-02 | 8987        |
| BP | GO:0035235 | ionotropic glutamate receptor signaling pathway                                   | 1/10 | 27/18862  | 1.42E-02 | 4.15E-02 | 445329      |
| BP | GO:0070199 | establishment of protein localization to chromosome                               | 1/10 | 27/18862  | 1.42E-02 | 4.15E-02 | 7015        |
| BP | GO:0090344 | negative regulation of cell aging                                                 | 1/10 | 28/18862  | 1.47E-02 | 4.17E-02 | 7015        |
| BP | GO:0045939 | negative regulation of steroid metabolic process                                  | 1/10 | 29/18862  | 1.53E-02 | 4.17E-02 | 54576       |
| BP | GO:0042402 | cellular biogenic amine catabolic process                                         | 1/10 | 30/18862  | 1.58E-02 | 4.17E-02 | 445329      |
| BP | GO:0070198 | protein localization to chromosome, telomeric region                              | 1/10 | 30/18862  | 1.58E-02 | 4.17E-02 | 7015        |
| BP | GO:1904837 | beta-catenin-TCF complex assembly                                                 | 1/10 | 31/18862  | 1.63E-02 | 4.17E-02 | 7015        |
| BP | GO:0009310 | amine catabolic process                                                           | 1/10 | 32/18862  | 1.68E-02 | 4.17E-02 | 445329      |
| BP | GO:1901099 | negative regulation of signal transduction in absence of ligand                   | 1/10 | 32/18862  | 1.68E-02 | 4.17E-02 | 7015        |
| BP | GO:2001240 | negative regulation of extrinsic apoptotic signaling pathway in absence of ligand | 1/10 | 32/18862  | 1.68E-02 | 4.17E-02 | 7015        |
| BP | GO:0032770 | positive regulation of monooxygenase activity                                     | 1/10 | 33/18862  | 1.74E-02 | 4.17E-02 | 7015        |
| BP | GO:0042573 | retinoic acid metabolic process                                                   | 1/10 | 33/18862  | 1.74E-02 | 4.17E-02 | 54576       |
| BP | GO:0045922 | negative regulation of fatty acid metabolic process                               | 1/10 | 34/18862  | 1.79E-02 | 4.17E-02 | 54576       |
| BP | GO:2000352 | negative regulation of endothelial cell apoptotic process                         | 1/10 | 34/18862  | 1.79E-02 | 4.17E-02 | 7015        |
| BP | GO:0060969 | negative regulation of gene silencing                                             | 1/10 | 37/18862  | 1.94E-02 | 4.44E-02 | 7015        |
| BP | GO:0042417 | dopamine metabolic process                                                        | 1/10 | 38/18862  | 2.00E-02 | 4.44E-02 | 445329      |
| BP | GO:0046326 | positive regulation of glucose import                                             | 1/10 | 38/18862  | 2.00E-02 | 4.44E-02 | 7015        |
| BP | GO:0007212 | dopamine receptor signaling pathway                                               | 1/10 | 40/18862  | 2.10E-02 | 4.51E-02 | 445329      |
| BP | GO:1902895 | positive regulation of pri-miRNA                                                  | 1/10 | 40/18862  | 2.10E-02 | 4.51E-02 | 7015        |

|    |            |                                                                                   |      |          |          |          |        |
|----|------------|-----------------------------------------------------------------------------------|------|----------|----------|----------|--------|
|    |            | transcription by RNA polymerase II                                                |      |          |          |          |        |
| BP | GO:0072091 | regulation of stem cell proliferation                                             | 1/10 | 41/18862 | 2.15E-02 | 4.51E-02 | 7015   |
| BP | GO:2001239 | regulation of extrinsic apoptotic<br>signaling pathway in absence of ligand       | 1/10 | 42/18862 | 2.21E-02 | 4.51E-02 | 7015   |
| BP | GO:1904738 | vascular associated smooth muscle cell<br>migration                               | 1/10 | 43/18862 | 2.26E-02 | 4.51E-02 | 7015   |
| BP | GO:1904752 | regulation of vascular associated<br>smooth muscle cell migration                 | 1/10 | 43/18862 | 2.26E-02 | 4.51E-02 | 7015   |
| BP | GO:0010828 | positive regulation of glucose<br>transmembrane transport                         | 1/10 | 45/18862 | 2.36E-02 | 4.51E-02 | 7015   |
| BP | GO:0014911 | positive regulation of smooth muscle<br>cell migration                            | 1/10 | 45/18862 | 2.36E-02 | 4.51E-02 | 7015   |
| BP | GO:1900087 | positive regulation of G1/S transition of<br>mitotic cell cycle                   | 1/10 | 45/18862 | 2.36E-02 | 4.51E-02 | 7015   |
| BP | GO:0031648 | protein destabilization                                                           | 1/10 | 46/18862 | 2.41E-02 | 4.51E-02 | 8293   |
| BP | GO:0097720 | calcineurin-mediated signaling                                                    | 1/10 | 46/18862 | 2.41E-02 | 4.51E-02 | 445329 |
| BP | GO:0044275 | cellular carbohydrate catabolic process                                           | 1/10 | 47/18862 | 2.46E-02 | 4.51E-02 | 8987   |
| BP | GO:1904707 | positive regulation of vascular<br>associated smooth muscle cell<br>proliferation | 1/10 | 47/18862 | 2.46E-02 | 4.51E-02 | 7015   |
| BP | GO:1904036 | negative regulation of epithelial cell<br>apoptotic process                       | 1/10 | 50/18862 | 2.62E-02 | 4.51E-02 | 7015   |
| BP | GO:1902893 | regulation of pri-miRNA transcription<br>by RNA polymerase II                     | 1/10 | 51/18862 | 2.67E-02 | 4.51E-02 | 7015   |
| BP | GO:0006584 | catecholamine metabolic process                                                   | 1/10 | 52/18862 | 2.72E-02 | 4.51E-02 | 445329 |
| BP | GO:0009712 | catechol-containing compound<br>metabolic process                                 | 1/10 | 52/18862 | 2.72E-02 | 4.51E-02 | 445329 |
| BP | GO:0035196 | production of miRNAs involved in<br>gene silencing by miRNA                       | 1/10 | 52/18862 | 2.72E-02 | 4.51E-02 | 7015   |
| BP | GO:0050999 | regulation of nitric-oxide synthase<br>activity                                   | 1/10 | 52/18862 | 2.72E-02 | 4.51E-02 | 7015   |
| BP | GO:0061614 | pri-miRNA transcription by RNA<br>polymerase II                                   | 1/10 | 52/18862 | 2.72E-02 | 4.51E-02 | 7015   |
| BP | GO:2000772 | regulation of cellular senescence                                                 | 1/10 | 52/18862 | 2.72E-02 | 4.51E-02 | 7015   |
| BP | GO:0007215 | glutamate receptor signaling pathway                                              | 1/10 | 53/18862 | 2.78E-02 | 4.51E-02 | 445329 |
| BP | GO:0046164 | alcohol catabolic process                                                         | 1/10 | 55/18862 | 2.88E-02 | 4.51E-02 | 445329 |
| BP | GO:0019748 | secondary metabolic process                                                       | 1/10 | 56/18862 | 2.93E-02 | 4.51E-02 | 54576  |
| BP | GO:0031050 | dsRNA processing                                                                  | 1/10 | 56/18862 | 2.93E-02 | 4.51E-02 | 7015   |
| BP | GO:0051353 | positive regulation of oxidoreductase<br>activity                                 | 1/10 | 56/18862 | 2.93E-02 | 4.51E-02 | 7015   |
| BP | GO:0070918 | production of small RNA involved in<br>gene silencing by RNA                      | 1/10 | 56/18862 | 2.93E-02 | 4.51E-02 | 7015   |
| BP | GO:1902808 | positive regulation of cell cycle G1/S<br>phase transition                        | 1/10 | 56/18862 | 2.93E-02 | 4.51E-02 | 7015   |

|    |            |                                                                       |      |          |          |          |        |
|----|------------|-----------------------------------------------------------------------|------|----------|----------|----------|--------|
| BP | GO:0002763 | positive regulation of myeloid<br>leukocyte differentiation           | 1/10 | 58/18862 | 3.03E-02 | 4.57E-02 | 9398   |
| BP | GO:2000351 | regulation of endothelial cell apoptotic<br>process                   | 1/10 | 58/18862 | 3.03E-02 | 4.57E-02 | 7015   |
| BP | GO:0046324 | regulation of glucose import                                          | 1/10 | 59/18862 | 3.09E-02 | 4.59E-02 | 7015   |
| BP | GO:0090342 | regulation of cell aging                                              | 1/10 | 60/18862 | 3.14E-02 | 4.60E-02 | 7015   |
| BP | GO:0046686 | response to cadmium ion                                               | 1/10 | 61/18862 | 3.19E-02 | 4.60E-02 | 7015   |
| BP | GO:1903961 | positive regulation of anion<br>transmembrane transport               | 1/10 | 61/18862 | 3.19E-02 | 4.60E-02 | 7015   |
| BP | GO:0061912 | selective autophagy                                                   | 1/10 | 62/18862 | 3.24E-02 | 4.63E-02 | 8987   |
| BP | GO:0072089 | stem cell proliferation                                               | 1/10 | 64/18862 | 3.34E-02 | 4.68E-02 | 7015   |
| BP | GO:0072577 | endothelial cell apoptotic process                                    | 1/10 | 64/18862 | 3.34E-02 | 4.68E-02 | 7015   |
| BP | GO:0032768 | regulation of monooxygenase activity                                  | 1/10 | 65/18862 | 3.39E-02 | 4.70E-02 | 7015   |
| BP | GO:0036498 | IRE1-mediated unfolded protein<br>response                            | 1/10 | 67/18862 | 3.50E-02 | 4.71E-02 | 445329 |
| BP | GO:0038034 | signal transduction in absence of ligand                              | 1/10 | 67/18862 | 3.50E-02 | 4.71E-02 | 7015   |
| BP | GO:0097192 | extrinsic apoptotic signaling pathway<br>in absence of ligand         | 1/10 | 67/18862 | 3.50E-02 | 4.71E-02 | 7015   |
| BP | GO:0007004 | telomere maintenance via telomerase                                   | 1/10 | 68/18862 | 3.55E-02 | 4.73E-02 | 7015   |
| BP | GO:0042440 | pigment metabolic process                                             | 1/10 | 72/18862 | 3.75E-02 | 4.93E-02 | 54576  |
| BP | GO:0005977 | glycogen metabolic process                                            | 1/10 | 74/18862 | 3.86E-02 | 4.93E-02 | 8987   |
| BP | GO:0046323 | glucose import                                                        | 1/10 | 74/18862 | 3.86E-02 | 4.93E-02 | 7015   |
| BP | GO:0006073 | cellular glucan metabolic process                                     | 1/10 | 75/18862 | 3.91E-02 | 4.93E-02 | 8987   |
| BP | GO:0006278 | RNA-dependent DNA biosynthetic<br>process                             | 1/10 | 75/18862 | 3.91E-02 | 4.93E-02 | 7015   |
| BP | GO:0044042 | glucan metabolic process                                              | 1/10 | 75/18862 | 3.91E-02 | 4.93E-02 | 8987   |
| BP | GO:0010827 | regulation of glucose transmembrane<br>transport                      | 1/10 | 77/18862 | 4.01E-02 | 4.97E-02 | 7015   |
| BP | GO:1901616 | organic hydroxy compound catabolic<br>process                         | 1/10 | 77/18862 | 4.01E-02 | 4.97E-02 | 445329 |
| BP | GO:0090398 | cellular senescence                                                   | 1/10 | 79/18862 | 4.11E-02 | 5.05E-02 | 7015   |
| BP | GO:0010833 | telomere maintenance via telomere<br>lengthening                      | 1/10 | 80/18862 | 4.16E-02 | 5.07E-02 | 7015   |
| BP | GO:0014910 | regulation of smooth muscle cell<br>migration                         | 1/10 | 81/18862 | 4.21E-02 | 5.08E-02 | 7015   |
| BP | GO:0032092 | positive regulation of protein binding                                | 1/10 | 83/18862 | 4.32E-02 | 5.08E-02 | 7015   |
| BP | GO:1904705 | regulation of vascular associated<br>smooth muscle cell proliferation | 1/10 | 83/18862 | 4.32E-02 | 5.08E-02 | 7015   |
| BP | GO:1990874 | vascular associated smooth muscle cell<br>proliferation               | 1/10 | 83/18862 | 4.32E-02 | 5.08E-02 | 7015   |
| BP | GO:1900182 | positive regulation of protein<br>localization to nucleus             | 1/10 | 85/18862 | 4.42E-02 | 5.15E-02 | 7015   |
| BP | GO:0006112 | energy reserve metabolic process                                      | 1/10 | 87/18862 | 4.52E-02 | 5.23E-02 | 8987   |
| BP | GO:0014909 | smooth muscle cell migration                                          | 1/10 | 88/18862 | 4.57E-02 | 5.24E-02 | 7015   |

|    |            |                                                                |      |          |          |          |        |
|----|------------|----------------------------------------------------------------|------|----------|----------|----------|--------|
| BP | GO:1903351 | cellular response to dopamine                                  | 1/10 | 89/18862 | 4.62E-02 | 5.25E-02 | 445329 |
| BP | GO:1903350 | response to dopamine                                           | 1/10 | 90/18862 | 4.67E-02 | 5.25E-02 | 445329 |
| BP | GO:0034502 | protein localization to chromosome                             | 1/10 | 91/18862 | 4.72E-02 | 5.25E-02 | 7015   |
| BP | GO:1901992 | positive regulation of mitotic cell cycle<br>phase transition  | 1/10 | 91/18862 | 4.72E-02 | 5.25E-02 | 7015   |
| BP | GO:0034308 | primary alcohol metabolic process                              | 1/10 | 94/18862 | 4.87E-02 | 5.33E-02 | 445329 |
| BP | GO:1904035 | regulation of epithelial cell apoptotic<br>process             | 1/10 | 94/18862 | 4.87E-02 | 5.33E-02 | 7015   |
| BP | GO:0048661 | positive regulation of smooth muscle<br>cell proliferation     | 1/10 | 96/18862 | 4.98E-02 | 5.35E-02 | 7015   |
| CC | GO:0000782 | telomere cap complex                                           | 1/11 | 13/19520 | 7.30E-03 | 2.88E-02 | 7015   |
| CC | GO:0000783 | nuclear telomere cap complex                                   | 1/11 | 13/19520 | 7.30E-03 | 2.88E-02 | 7015   |
| CC | GO:0140445 | chromosome, telomeric repeat region                            | 1/11 | 13/19520 | 7.30E-03 | 2.88E-02 | 7015   |
| CC | GO:0034045 | phagophore assembly site membrane                              | 1/11 | 15/19520 | 8.42E-03 | 2.88E-02 | 8987   |
| CC | GO:0005697 | telomerase holoenzyme complex                                  | 1/11 | 22/19520 | 1.23E-02 | 3.37E-02 | 7015   |
| CC | GO:0000407 | phagophore assembly site                                       | 1/11 | 31/19520 | 1.73E-02 | 3.95E-02 | 8987   |
| CC | GO:0009295 | nucleoid                                                       | 1/11 | 44/19520 | 2.45E-02 | 4.19E-02 | 7015   |
| CC | GO:0042645 | mitochondrial nucleoid                                         | 1/11 | 44/19520 | 2.45E-02 | 4.19E-02 | 7015   |
| CC | GO:0030315 | T-tubule                                                       | 1/11 | 51/19520 | 2.84E-02 | 4.31E-02 | 8987   |
| CC | GO:0101003 | ficolin-1-rich granule membrane                                | 1/11 | 61/19520 | 3.39E-02 | 4.63E-02 | 8987   |
| CC | GO:0070821 | tertiary granule membrane                                      | 1/11 | 73/19520 | 4.04E-02 | 5.02E-02 | 8987   |
| CC | GO:0005643 | nuclear pore                                                   | 1/11 | 85/19520 | 4.69E-02 | 5.35E-02 | 729540 |
| MF | GO:0003964 | RNA-directed DNA polymerase<br>activity                        | 1/11 | 12/18337 | 7.18E-03 | 4.54E-02 | 7015   |
| MF | GO:0001972 | retinoic acid binding                                          | 1/11 | 20/18337 | 1.19E-02 | 4.54E-02 | 54576  |
| MF | GO:0070034 | telomerase RNA binding                                         | 1/11 | 22/18337 | 1.31E-02 | 4.54E-02 | 7015   |
| MF | GO:0030247 | polysaccharide binding                                         | 1/11 | 25/18337 | 1.49E-02 | 4.54E-02 | 8987   |
| MF | GO:0001223 | transcription coactivator binding                              | 1/11 | 26/18337 | 1.55E-02 | 4.54E-02 | 7015   |
| MF | GO:0015020 | glucuronosyltransferase activity                               | 1/11 | 34/18337 | 2.02E-02 | 4.54E-02 | 54576  |
| MF | GO:0034061 | DNA polymerase activity                                        | 1/11 | 36/18337 | 2.14E-02 | 4.54E-02 | 7015   |
| MF | GO:0042162 | telomeric DNA binding                                          | 1/11 | 36/18337 | 2.14E-02 | 4.54E-02 | 7015   |
| MF | GO:0005501 | retinoid binding                                               | 1/11 | 37/18337 | 2.20E-02 | 4.54E-02 | 54576  |
| MF | GO:0005504 | fatty acid binding                                             | 1/11 | 37/18337 | 2.20E-02 | 4.54E-02 | 54576  |
| MF | GO:0019840 | isoprenoid binding                                             | 1/11 | 38/18337 | 2.26E-02 | 4.54E-02 | 54576  |
| MF | GO:0034062 | 5'-3' RNA polymerase activity                                  | 1/11 | 43/18337 | 2.55E-02 | 4.54E-02 | 7015   |
| MF | GO:0097747 | RNA polymerase activity                                        | 1/11 | 43/18337 | 2.55E-02 | 4.54E-02 | 7015   |
| MF | GO:0008146 | sulfotransferase activity                                      | 1/11 | 52/18337 | 3.08E-02 | 5.09E-02 | 445329 |
| MF | GO:0001221 | transcription coregulator binding                              | 1/11 | 61/18337 | 3.60E-02 | 5.38E-02 | 7015   |
| MF | GO:0000049 | tRNA binding                                                   | 1/11 | 67/18337 | 3.95E-02 | 5.38E-02 | 7015   |
| MF | GO:0016782 | transferase activity, transferring<br>sulfur-containing groups | 1/11 | 69/18337 | 4.06E-02 | 5.38E-02 | 445329 |
| MF | GO:0033293 | monocarboxylic acid binding                                    | 1/11 | 71/18337 | 4.18E-02 | 5.38E-02 | 54576  |
